# Supplementary material
Source: bioRxiv or medRxiv preprint supplement (https://www.biorxiv.org/highwire/filestream/95377/field_highwire_adjunct_files/1/308296-2.pdf)

IMPUTE info metric

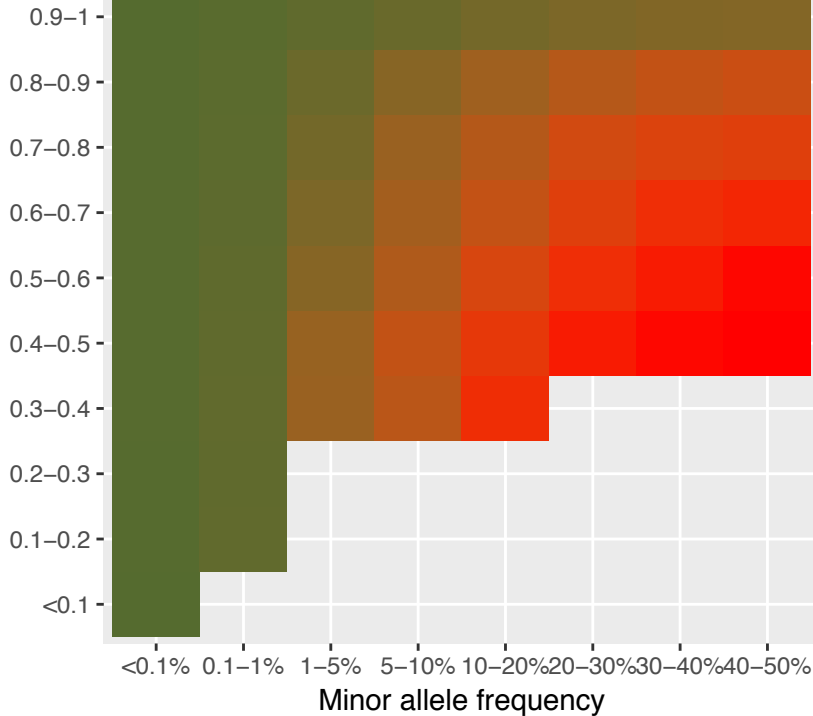

Average  
storage size (kb)

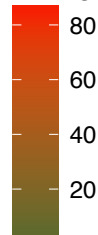

Supplement: Supplementary file [file 308296-2.pdf]
